# Supplementary material for: Stereocomplex-affected crystallization behaviour of PDLA in PDLA/PLDLA blends
Source: Royal Society of Chemistry journal article supplement (doi:10.1039/c8ce01934g), 2018-11-26
Supplement: c8ce01934g1.pdf [file c8ce01934g1.pdf]

## Supporting Information

### Stereocomplex Affected Crystallization Behavior of PDLA in PDLA/PLDLA blends

Lu Cheng<sup>1</sup>, Cunliang Hu<sup>1</sup>, Jingqing Li<sup>\*1</sup>, Shaoyong Huang<sup>\*2</sup>, Shichun Jiang<sup>\*1</sup>

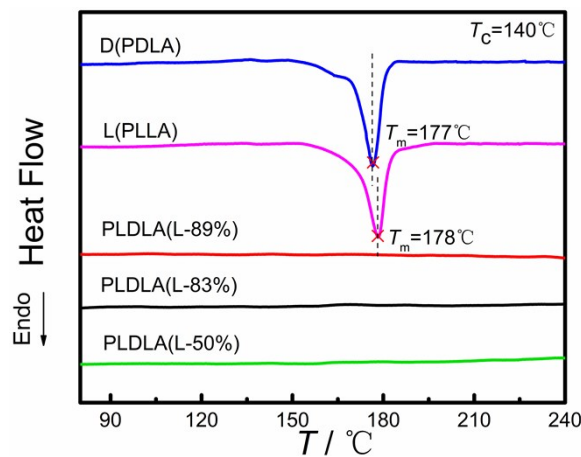

**Figure S1** DSC melting curves at 10 °C/min of all the synthesized samples of PDLA (D), PLLA (L), and PLDLA copolymers (L-x=89, 83, 50 %) after isothermally crystallized at 140 °C for the same time.

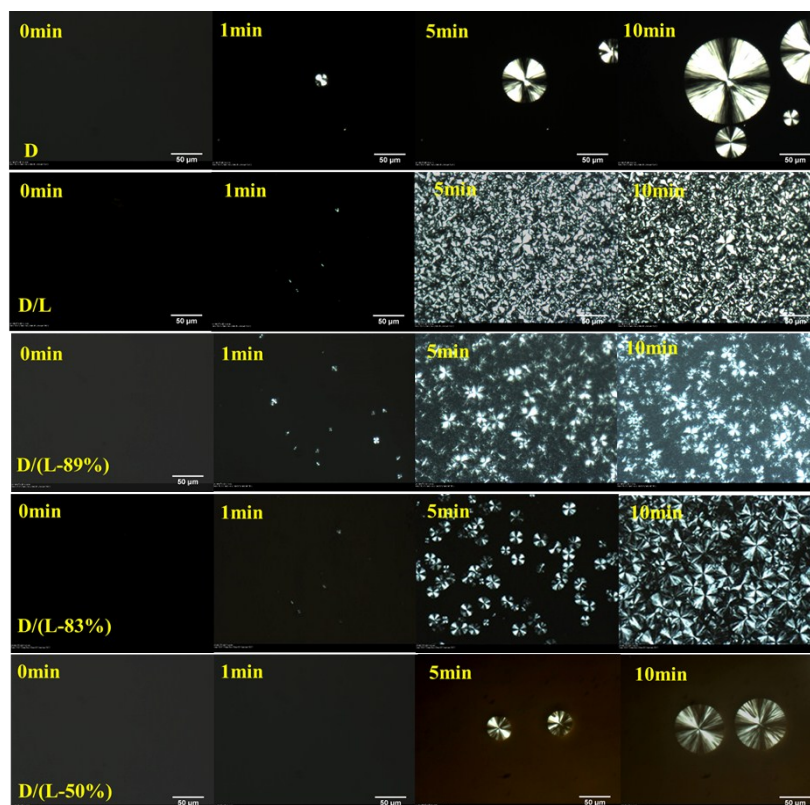

**Figure S2** POM images of the samples as depicted crystallizing from melt during their isothermal crystallization processes at 130 °C

\* Corresponding authors: [sejiang@tju.edu.cn](mailto:sejiang@tju.edu.cn), [syhuang@ciac.ac.cn](mailto:syhuang@ciac.ac.cn), [jqli11103@tju.edu.cn](mailto:jqli11103@tju.edu.cn)

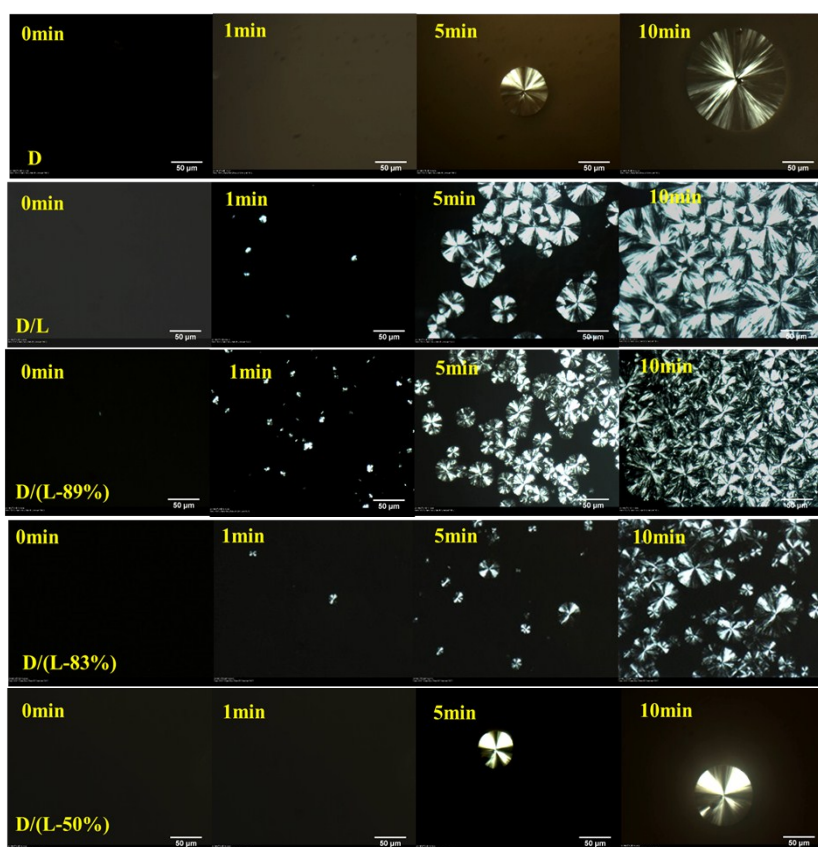

**Figure S3** POM images of the samples as depicted crystallizing from melt during their isothermal crystallization processes at 140 °C

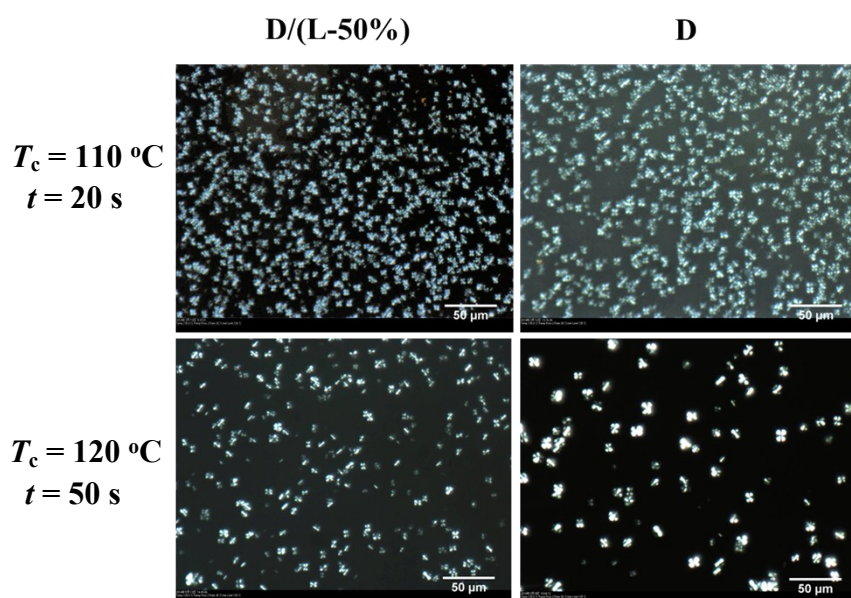

**Figure S4** POM images of the samples as depicted after isothermally crystallizing from melt at 110 °C for 20 s and 120 °C for 50 s, respectively.

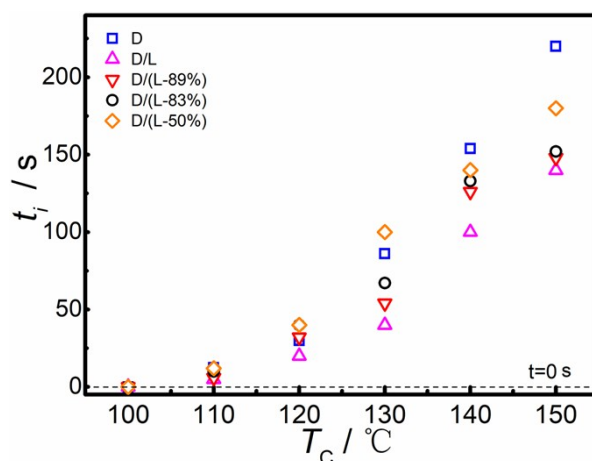

**Figure S5** Induction periods of the samples as depicted while isothermally crystallizing from melt at various temperatures  $T_c$ s.

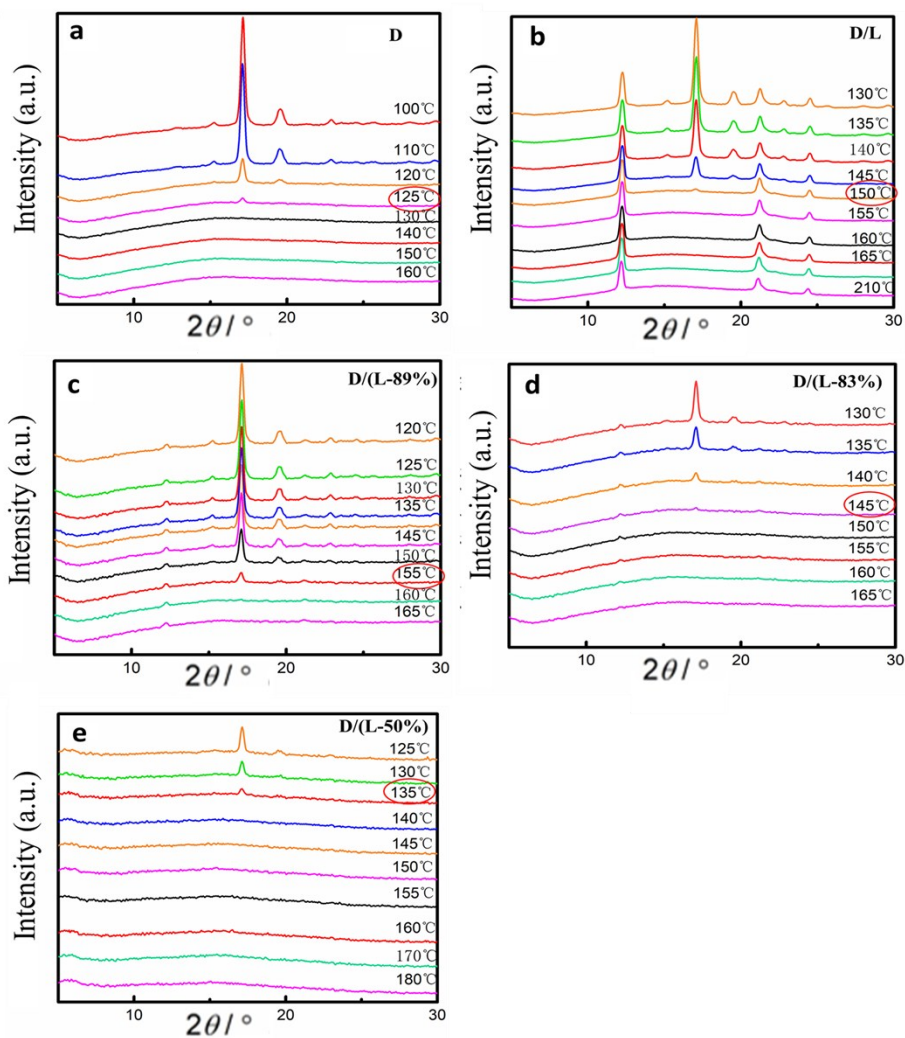

**Figure S6** In-situ 1D-WAXS profiles collected during the non-isothermal crystallization processes at cooling rates of 10 °C/min of the samples including D (a), D/L (b), D/(L-89%) (c), D/(L-83%) (d), and D/(L-50%) (e) as depicted.

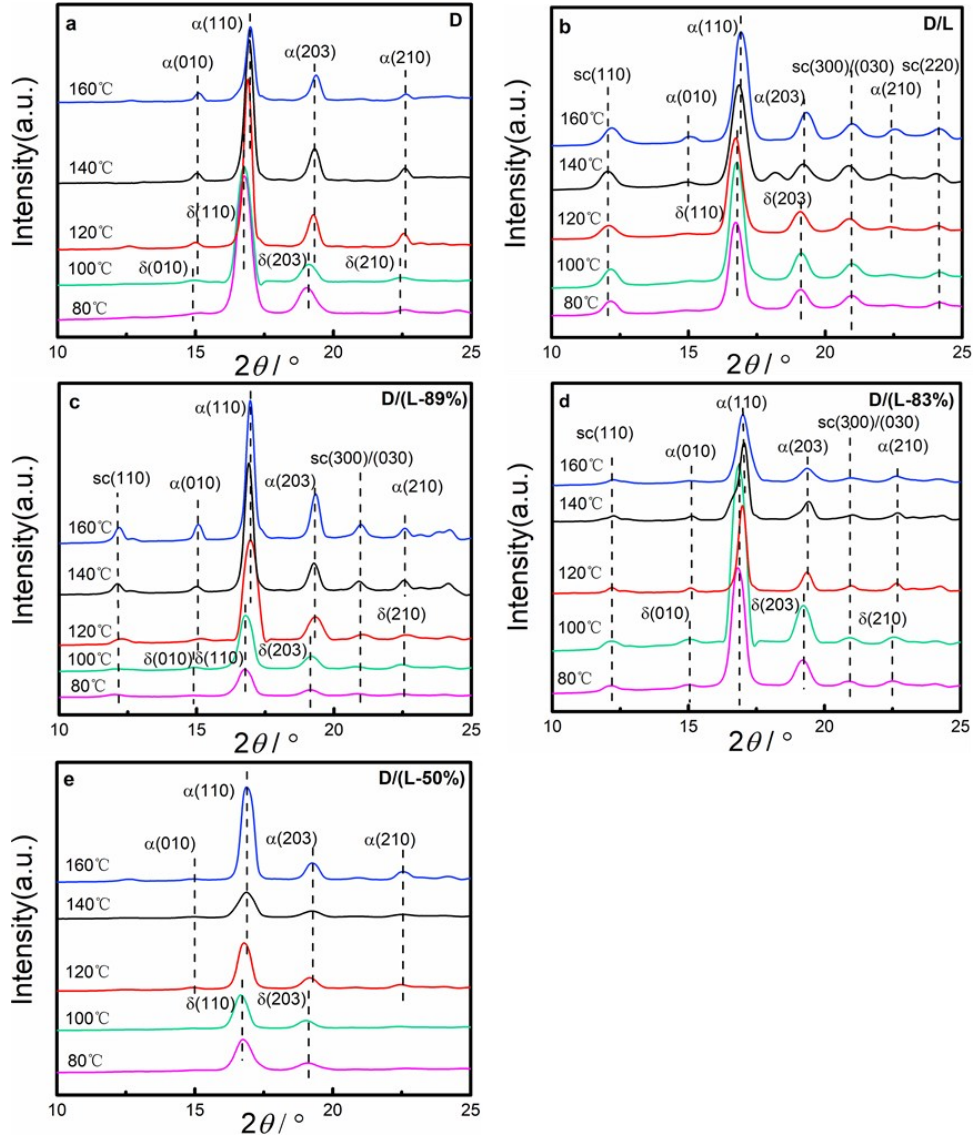

**Figure S7** XRD profiles of D (a), D/L (b), D/(L-89%) (c), D/(L-83%) (d), and D/(L-50%) (e) isothermally crystallized at the depicted various temperatures.

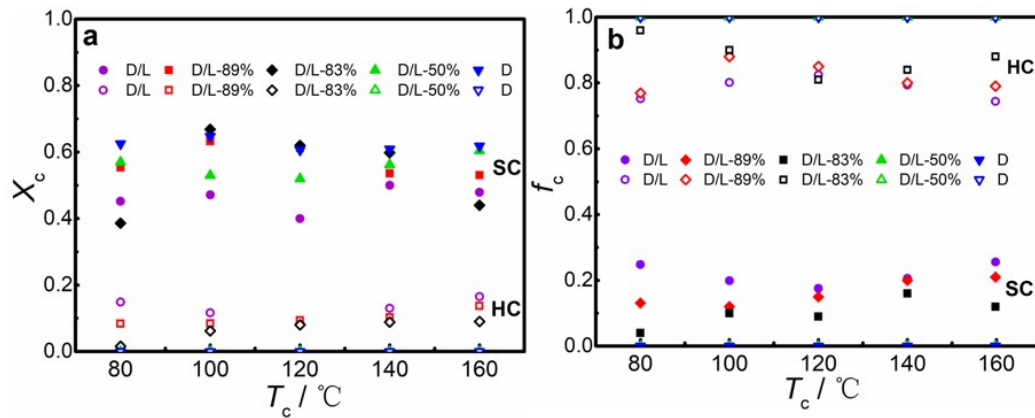

**Figure S8**  $T_c$ -dependent relative crystallinity of the depicted samples isothermally crystallized from the melt at  $T_c$ s for 6 hours (a) and the formed SC and HC crystal fractions (b). The open and solid symbols refer to HC and SC crystals in the samples.



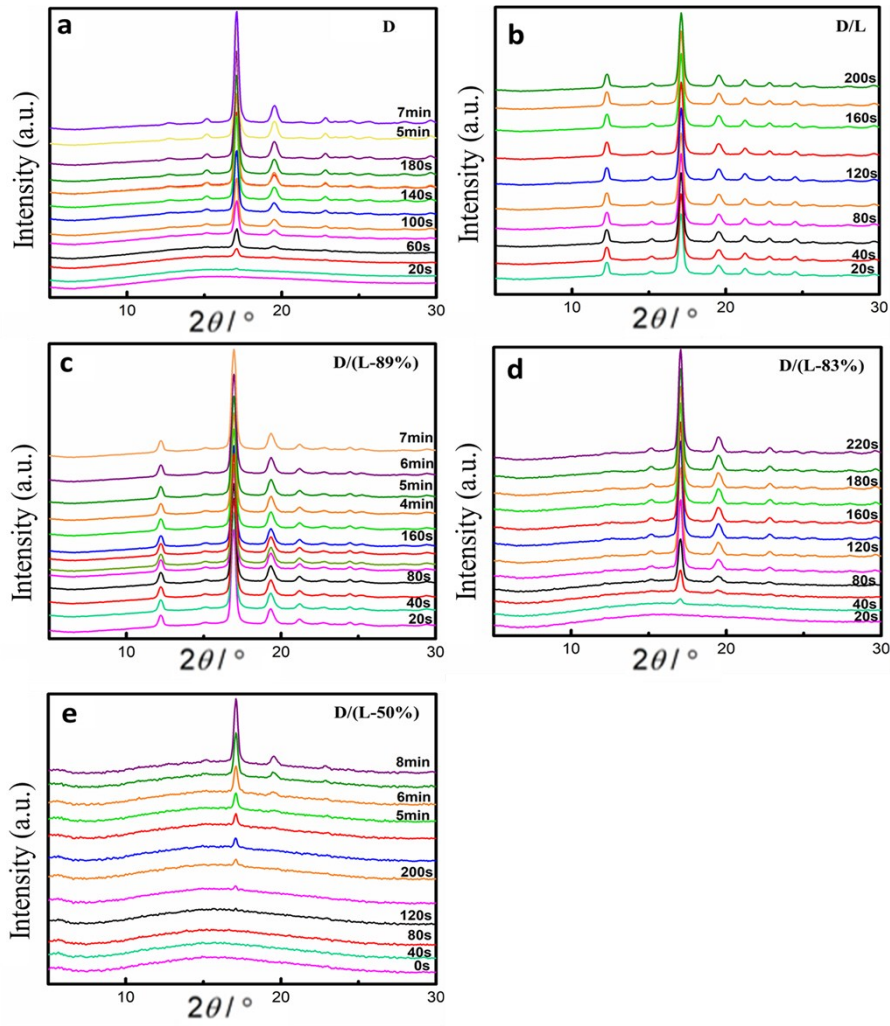

**Figure S9** In-situ 1D-WAXS profiles of the isothermally crystallizing PDLA (a), D/L (b), D/(L-89%) (c), D/(L-83%) (d), and D/(L-50%) (e) at 130 °C.

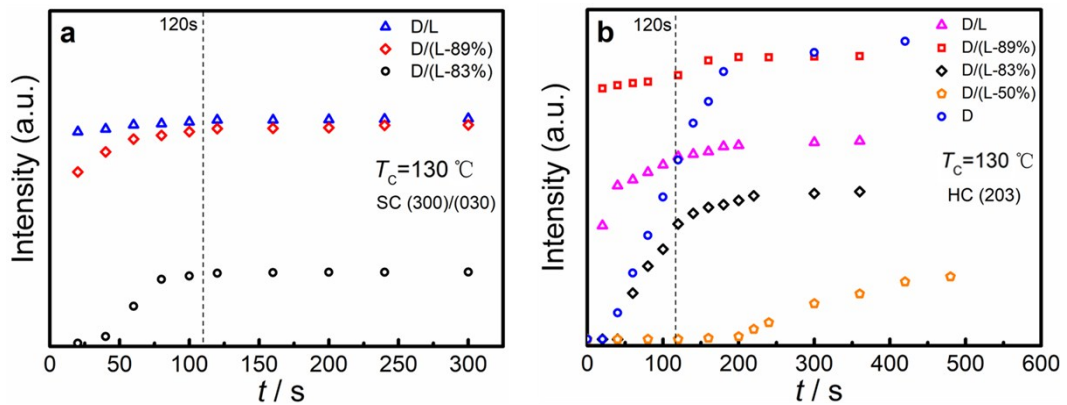

**Figure S10** Diffraction peaks intensity of the samples as depicted representing the SC and HC crystallinities dependent on crystallization time  $t$  during isothermal crystallization process characterized by in-situ WAXS at 130 °C.

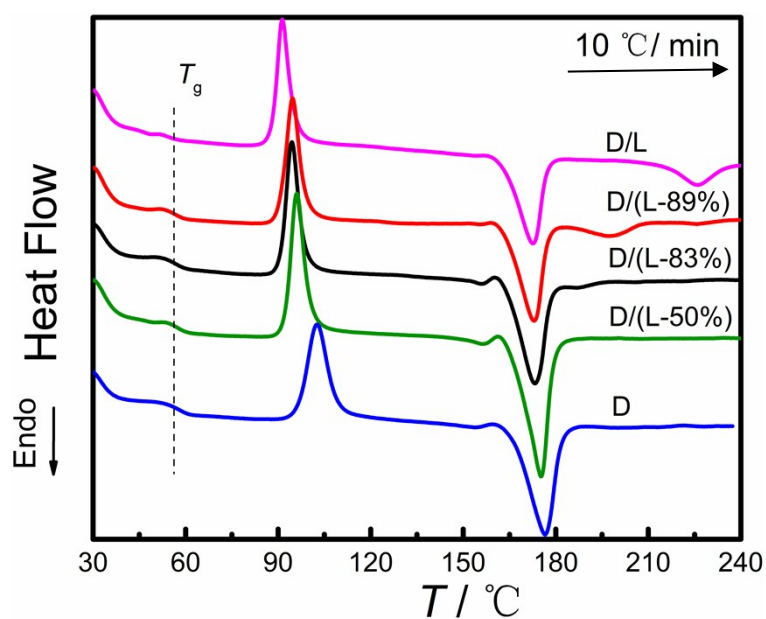

**Figure S11** The glass transition temperature of the melt-quenched amorphous-made samples D/L, D/(L-89 %), D/(L-83 %), and D/(L-50 %) blends as depicted in comparison with that of neat PDLA determined by DSC with a heating rate of 10 °C/min.

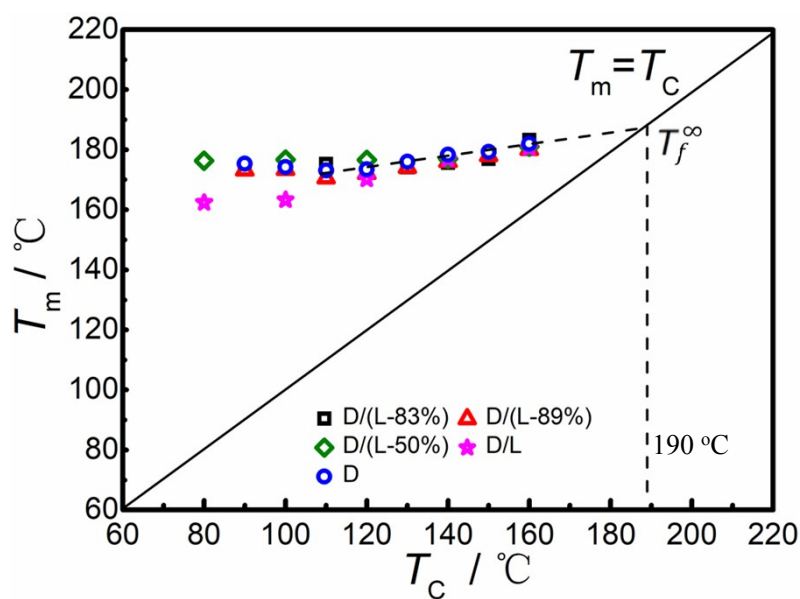

**Figure S12** Equilibrium melting point of PDLA HC crystals in the D/L, D/(L-89 %), D/(L-83 %), and D/(L-50 %) blends as depicted in comparison with that of neat PDLA.
